# Supplementary material for: Circulating Tumor DNA in Stage III Colorectal Cancer, beyond Minimal Residual Disease Detection, toward Assessment of Adjuvant Therapy Efficacy and Clinical Behavior of Recurrences
Source: Oxford University Press journal article supplement (doi:10.1158/1078-0432.ccr-21-2404), 2021-10-01
Supplement: ccr-21-2404_supps1.pdf [file ccr-21-2404_supps1.pdf]

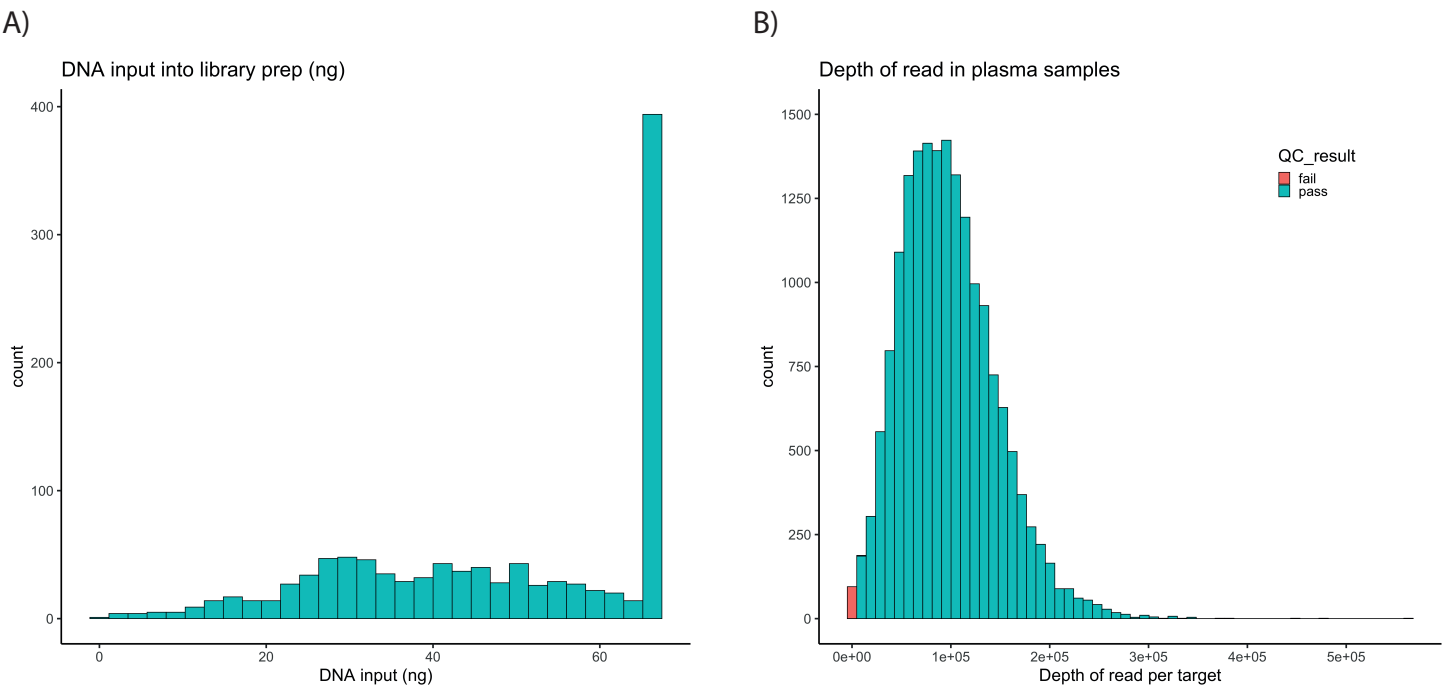

**Supplementary Figure S1: Quality Control Metrics for cfDNA Sequencing by Signatera.** A) DNA input for NGS libraries. Input was capped at 66 ng. B) Depth of Read (DoR) for each amplicon in plasma samples. Amplicons with DoR<5000 were counted as failed and excluded from further analyses.
