# Supplementary material for: Circulating Tumor DNA in Stage III Colorectal Cancer, beyond Minimal Residual Disease Detection, toward Assessment of Adjuvant Therapy Efficacy and Clinical Behavior of Recurrences
Source: Oxford University Press journal article supplement (doi:10.1158/1078-0432.ccr-21-2404), 2021-10-01
Supplement: ccr-21-2404_supps3.xlsx [file ccr-21-2404_supps3.xlsx]

## Sheet: Suppl Table S3
Supplementary Table S3: Log-linear regression of changes in ctDNA level, using either all samples or just two samples.
		Regression with all samples			Regression with first two consecutive samples	Multiple regressions, using any two consecutive time points
Patient	Samples	R2	MSEa	Class	Class	Number of regressionsb	Same classificationc
216	8	0.89	0.0320398	Slow	Slow	7	7/7
28	6	0.94	0.0438625	Slow	Fast	5	4/5
215	6	0.98	0.00469775	Slow	Slow	5	5/5
81	5	0.87	0.0395419	Slow	Slow	4	4/4
79	4	0.96	0.0132046	Slow	Fast	3	2/3
85	4	1.00	0.00184972	Fast	Fast	3	3/3
68	3	1.00	0.00107465	Fast	Fast	2	2/2
124	3	0.94	0.0835785	Fast	Fast	2	2/2
221	3	0.93	0.0712628	Fast	Fast	2	2/2
261	3	0.82	0.0114485	Slow	Slow	2	2/2
18	2	-	-	Slow	Slow	-	-
30	2	-	-	Fast	Fast	-	-
75	2	-	-	Fast	Fast	-	-
82	2	-	-	Slow	Slow	-	-
119	2	-	-	Fast	Fast	-	-
246	2	-	-	Slow	Slow	-	-
302	2	-	-	Fast	Fast	-	-
a Mean Squared Error
b Number of different consecutive sample pairs, for the given patient
c Number of times the same class was called, as when using all samples
